# Supplementary material
Source: MDPI journal article supplement (https://www.mdpi.com/2072-4292/16/5/730)
Supplement: s1 [file s1]

---

## Supplementary materials

### Machine learning-based estimation of daily cropland evapotranspiration in diverse climate zones

#### Supplementary Table Captions

**Table. S1.** Site codes and corresponding full names of the 15 crop flux tower sites used in this study.

**Table. S2.** Hyperparameters of Machine Learning Models Used in This Study.

**Table. S3.** The average and standard deviation of the Pearson correlation coefficients between input factors and evapotranspiration (ET). At each site, Pearson correlation coefficients were independently calculated.

## Supplemental tables

**Supplementary Table S1.** Site codes and corresponding full names of the 15 crop flux tower sites used in this study.

| Site code | Site name                                   | Latitude (°) | Longitude (°) | Country     | Period    |
|-----------|---------------------------------------------|--------------|---------------|-------------|-----------|
| US-ARM    | ARM Southern Great Plains site Lamout       | 36.6058      | -97.4888      | USA         | 2003-2012 |
| US-CRT    | Curtice walter-Berger cropland              | 41.6285      | - 83.3471     | USA         | 2011-2013 |
| US-Ne1    | Mead-irrigation continuos maize site        | 41.1651      | -96.4766      | USA         | 2001-2013 |
| US-Ne2    | Mead-irrigation maize-soybean rotation site | 41.1649      | - 96.4701     | USA         | 2001-2013 |
| US-Ne3    | Mead-rained maize-soybean rotation site     | 41.1797      | - 96.4397     | USA         | 2001-2013 |
| IT-BCi    | Borgo Cioff                                 | 40.5238      | 14.9574       | Italy       | 2004-2014 |
| IT-CA2    | Castel d'SSO 2                              | 42.3772      | 12.0260       | Italy       | 2011-2014 |
| US-TW2    | Twitchell Corn                              | 38.1047      | -121.6433     | USA         | 2012-2013 |
| US-TW3    | Twitchell Alfalfa                           | 38.1152      | -121.6469     | USA         | 2013-2014 |
| US-TW     | Twitchell Island                            | 38.1087      | -121.6531     | USA         | 2009-2014 |
| BE-Lon    | Lonze                                       | 50.5516      | 4.7461        | Belgium     | 2004-2014 |
| CH-Oe2    | Switzer-land                                | 47.2863      | 7.7343        | Switzerland | 2004-2014 |
| DE-Geb    | Gebesee                                     | 51.1001      | 10.9143       | Germany     | 2001-2014 |
| DE-Kli    | Klingenberg                                 | 50.8931      | 13.5224       | Germany     | 2004-2014 |
| FR-Gri    | Grignon                                     | 48.8442      | 1.9519        | France      | 2004-2014 |

**Supplementary Table S2.** Hyperparameters of Machine Learning Models Used in This Study.

| Model | Hyperparameter                                   | Value            |
|-------|--------------------------------------------------|------------------|
| RF    | Number of variables sampled at each split (Mtry) | 3                |
|       | Number of trees (Ntree)                          | 500              |
| SVM   | Kernel type                                      | Radial           |
|       | Gamma parameter                                  | 1/9              |
|       | Learning rate                                    | 0.3              |
| XGB   | Maximum tree depth                               | 6                |
|       | Maximum number of boosting iterations            | 10               |
| BP    | Number of neurons in one layer                   | 5                |
|       | Error threshold                                  | 10 <sup>-6</sup> |
|       | Maximum iterations                               | 1000             |

**Supplementary Table S3** The average and standard deviation of the Pearson correlation coefficients between input factors and evapotranspiration (ET). At each site, Pearson correlation coefficients were independently calculated.

| Climate zone | Items     | R <sub>n</sub> | PPFD       | LAI        | T <sub>a</sub> | EF         | VPD        | G          | P          | U          |
|--------------|-----------|----------------|------------|------------|----------------|------------|------------|------------|------------|------------|
| All sites    | <i>r</i>  | 0.76           | 0.66       | 0.59       | 0.57           | 0.52       | 0.44       | 0.36       | -0.23      | -0.01      |
|              | $\pm std$ | $\pm 0.12$     | $\pm 0.13$ | $\pm 0.25$ | $\pm 0.17$     | $\pm 0.15$ | $\pm 0.17$ | $\pm 0.18$ | $\pm 0.20$ | $\pm 0.27$ |
| SMCZ         | <i>r</i>  | 0.67           | 0.62       | 0.49       | 0.52           | 0.52       | 0.36       | 0.27       | -0.41      | 0.23       |
|              | $\pm std$ | $\pm 0.19$     | $\pm 0.20$ | $\pm 0.37$ | $\pm 0.26$     | $\pm 0.23$ | $\pm 0.22$ | $\pm 0.25$ | $\pm 0.25$ | $\pm 0.34$ |
| TCZ          | <i>r</i>  | 0.81           | 0.72       | 0.55       | 0.55           | 0.45       | 0.53       | 0.49       | -0.08      | -0.07      |
|              | $\pm std$ | $\pm 0.04$     | $\pm 0.11$ | $\pm 0.10$ | $\pm 0.13$     | $\pm 0.09$ | $\pm 0.17$ | $\pm 0.12$ | $\pm 0.08$ | $\pm 0.09$ |
| TCCZ         | <i>r</i>  | 0.78           | 0.64       | 0.73       | 0.63           | 0.60       | 0.44       | 0.32       | -0.19      | -0.20      |
|              | $\pm std$ | $\pm 0.05$     | $\pm 0.03$ | $\pm 0.17$ | $\pm 0.07$     | $\pm 0.10$ | $\pm 0.07$ | $\pm 0.07$ | $\pm 0.07$ | $\pm 0.12$ |
